# Supplementary material
Source: ML conference proceedings conference paper supplement (https://proceedings.mlr.press/v139/rasul21a.html)
Supplement: Supplementary file [file rasul21a-supp.pdf]

## A. Additional Metrics

### A.1. CRPS

The average marginal CRPS over dimensions  $D$  and over the predicted time steps compared to the test interval of each dataset is reported in Table 3.

Table 3. Test set CRPS comparison (lower is better) of models on six real world data sets. Mean and standard error metrics for TimeGrad obtained by re-training and evaluating 10 times.

| Method                     | Exchange           | Solar              | Electricity        | Traffic            | Taxi              | Wikipedia          |
|----------------------------|--------------------|--------------------|--------------------|--------------------|-------------------|--------------------|
| VAR                        | 0.015±0.000        | 0.595±0.000        | 0.060±0.000        | 0.222±0.000        | 0.410±0.000       | 4.101±0.002        |
| GARCH                      | 0.024±0.000        | 0.928±0.000        | 0.291±0.000        | 0.426±0.000        | -                 | -                  |
| Vec-LSTM<br>ind-scaling    | 0.013±0.000        | 0.434±0.012        | 0.059±0.001        | 0.168±0.037        | 0.586±0.004.      | 0.379±0.004        |
| Vec-LSTM<br>lowrank-Copula | 0.009±0.000        | 0.384±0.010        | 0.084±0.006        | 0.165±0.004        | 0.416±0.004       | 0.247±0.001        |
| GP<br>scaling              | 0.017±0.000        | 0.415±0.009        | 0.053±0.000        | 0.140±0.002        | 0.346±0.348       | 1.549±1.017        |
| GP<br>Copula               | <b>0.008±0.000</b> | 0.371±0.022        | 0.056±0.002        | 0.133±0.001        | 0.360±0.201       | <b>0.236±0.000</b> |
| Transformer<br>MAF         | 0.012±0.003        | 0.368±0.001        | 0.052±0.000        | 0.134±0.001        | 0.377±0.002       | 0.274±0.007        |
| <b>TimeGrad</b>            | 0.009±0.001        | <b>0.367±0.001</b> | <b>0.049±0.002</b> | <b>0.110±0.002</b> | <b>0.311±0.03</b> | 0.261±0.02         |

### A.2. MSE

The MSE is defined as the mean squared error over all the time series dimensions  $D$  and over the whole prediction range with respect to the test data. Results comparing the different methods for the datasets considered are given in Table 4.

Table 4. Test set MSE comparison (lower is better) of models on six real world data sets.

| Method                     | Exchange                               | Solar                               | Electricity                         | Traffic                                | Taxi                                | Wikipedia                           |
|----------------------------|----------------------------------------|-------------------------------------|-------------------------------------|----------------------------------------|-------------------------------------|-------------------------------------|
| VAR                        | $4.4 \times 10^{-2}$                   | $7.0 \times 10^3$                   | $1.2 \times 10^7$                   | $5.1 \times 10^{-3}$                   | -                                   | -                                   |
| GARCH                      | $4.0 \times 10^{-2}$                   | $3.5 \times 10^3$                   | $1.2 \times 10^6$                   | $3.3 \times 10^{-3}$                   | -                                   | -                                   |
| Vec-LSTM<br>ind-scaling    | <b><math>1.6 \times 10^{-4}</math></b> | $9.3 \times 10^2$                   | $2.1 \times 10^5$                   | $6.3 \times 10^{-4}$                   | $7.3 \times 10^1$                   | $7.2 \times 10^7$                   |
| Vec-LSTM<br>lowrank-Copula | $1.9 \times 10^{-4}$                   | $2.9 \times 10^3$                   | $5.5 \times 10^6$                   | $1.5 \times 10^{-3}$                   | $5.1 \times 10^1$                   | $3.8 \times 10^7$                   |
| GP<br>scaling              | $2.9 \times 10^{-4}$                   | $1.1 \times 10^3$                   | <b><math>1.8 \times 10^5</math></b> | $5.2 \times 10^{-4}$                   | $2.7 \times 10^1$                   | $5.5 \times 10^7$                   |
| GP<br>Copula               | $1.7 \times 10^{-4}$                   | $9.8 \times 10^2$                   | $2.4 \times 10^5$                   | $6.9 \times 10^{-4}$                   | $3.1 \times 10^1$                   | $4.0 \times 10^7$                   |
| Transformer<br>MAF         | $3.4 \times 10^{-4}$                   | $9.3 \times 10^2$                   | $2.0 \times 10^5$                   | $5.0 \times 10^{-4}$                   | $4.5 \times 10^1$                   | <b><math>3.1 \times 10^7</math></b> |
| <b>TimeGrad</b>            | $2.5 \times 10^{-4}$                   | <b><math>8.8 \times 10^2</math></b> | $1.97 \times 10^5$                  | <b><math>4.2 \times 10^{-4}</math></b> | <b><math>2.6 \times 10^1</math></b> | $3.8 \times 10^7$                   |
